# Supplementary material
Source: publisher figshare collection journal article supplement (https://acs.figshare.com/ndownloader/files/17279960)
Supplement: Supplementary file 1 [file 17279960]

## Supporting Information

### Simplify: A Mass Spectrometry Metabolomics Approach to Identify Additives and Synergists from Complex Mixtures

Lindsay K. Caesar<sup>1</sup>, Sabina Nogo<sup>1</sup>, Cassandra N. Naphen<sup>1</sup>, and Nadja B. Cech<sup>1,\*</sup>

<sup>1</sup> *Department of Chemistry & Biochemistry, University of North Carolina Greensboro, Greensboro, NC 27402, United States*

#### Content

- Figure S1: Fractionation Scheme
- Experimental Protocol: chromatographic separation and isolation of compounds **1**, **4**, and **5**.
- Figure S2: Fragmentation patterns of dihydrotanshinone I (compound **2**).
- Figure S3: Fragmentation patterns of tanshinone IIA (compound **3**).
- Figure S4: Fragmentation patterns of sugiol (compound **5**).
- Table S1: NMR data for sugiol (compound **5**) in CDCl<sub>3</sub>
- Figure S5: <sup>1</sup>H-NMR data for compound **5** (500 MHz, CDCl<sub>3</sub>)
- Figure S6: <sup>13</sup>C-NMR data for compound **5** (125 MHz, CDCl<sub>3</sub>)
- Figure S7: HSQC data for compound **5** (500 MHz, CDCl<sub>3</sub>)
- Figure S8: HMBC data for compound **5** (500 MHz, CDCl<sub>3</sub>)
- Figure S9: <sup>1</sup>H-NMR data for compound **5** (500 MHz, DMSO-d<sub>6</sub>)
- Figure S10: <sup>1</sup>H-NMR data for compound **1** (500 MHz, CDCl<sub>3</sub>)
- Figure S11: <sup>13</sup>C-NMR data for compound **1** (125 MHz, CDCl<sub>3</sub>)
- Figure S12: Fragmentation patterns of cryptotanshinone (compound **1**)
- Figure S13: <sup>1</sup>H-NMR data for compound **4** (500 MHz, CDCl<sub>3</sub>)
- Figure S14: Calibration curve of cryptotanshinone (compound **1**)
- Table S2: Complete list of chemical contaminants removed from analysis using hierarchical cluster analysis coupled to spectral variable inspection of triplicate injections.
- Figure S15: Predicted versus actual activities of sub-fractions simplified from synergistic fraction SM-3 measured at 10 µg/mL.
- Figure S16: Dose response curves for compounds **1**, **2**, **3**, and **5**.

\*Corresponding author

email: nadja\_cech@uncg.edu, tel: 336-324-5011, fax: 336-334-5402

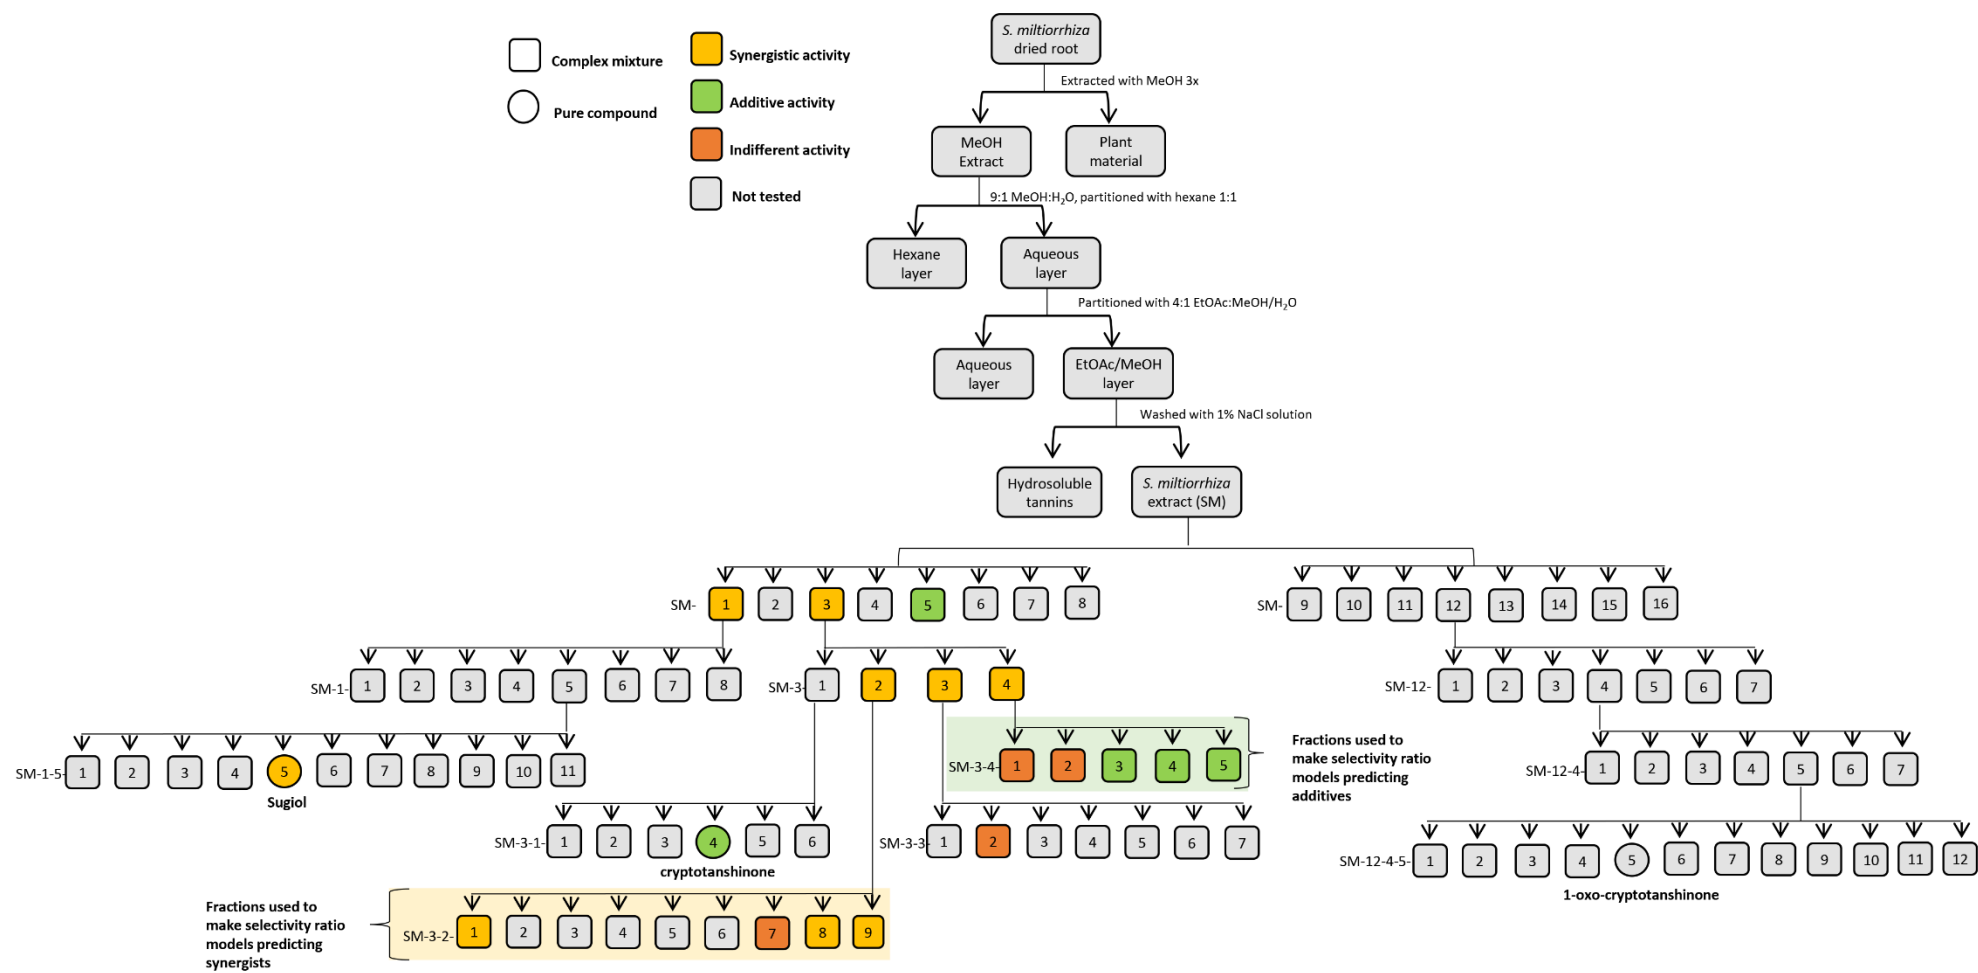

**Figure S1:** Fractionation Scheme

## Experimental Protocol:

### Materials and Methods

#### *Chromatographic separation and isolation.*

The first-stage separations of the EtOAc extract (SM) were conducted on an aliquot of 8.6 g of the extract using normal-stage flash chromatography (120-g silica column) at an 85 mL/min flow rate with a 45-min hexane/CH<sub>3</sub>Cl/MeOH gradient. Two fractions, SM-1 and SM-3, were selected for further chromatographic separation. The first fraction (SM-1, 185.72 mg) was subjected to reversed-phase preparative HPLC injected onto a Gemini preparatory column (5 µm C18, 250 x 21.20 mm; Phenomenex) at a flow rate of 21.4 mL/min with a 45-min gradient. The gradient began at 65:35 CH<sub>3</sub>CN:H<sub>2</sub>O and increased to 90:10 over 35 min, following which the column was held at 100:0 for 10 min, yielding 8 fractions. Fraction 5 (SM-1-5, 36.51 mg) was subjected to a final round of reversed-phase preparative HPLC injected onto a Gemini preparatory column (5 µm C18, 250 x 21.20 mm; Phenomenex). The 30 min run began at 70:30 CH<sub>3</sub>CN:H<sub>2</sub>O and was increased to 100:0 over 30 min. Compound **5** (SM-1-5-5) eluted from 12-14 min (1.39 mg, 98% purity, 0.0003% yield). Fraction SM-3 (1058.67 mg) was subjected to a second round of normal-phase flash chromatography (40-g silica column) at a flow rate of 40 mL/min and a 55 min hexane/CH<sub>3</sub>Cl/MeOH gradient, yielding four fractions. Fraction one (SM-3-1, 844.33 mg) eluted from 6-9 min, and was subjected to an additional round of reversed-phase flash chromatography using an 86g C18 reversed-phase RediSep Rf column with a 60 mL/min flow rate. A 60-min gradient of CH<sub>3</sub>CN was used ranging from 45-100% CH<sub>3</sub>CN. Compound **1** eluted at 25 min (580.01 mg, 95.0% purity, 0.1% yield).

Compound **4** was isolated using the remaining 9.7 g of the EtOAc extract (SM). First, normal-stage flash chromatography (80-g silica column) was conducted with a 40-min hexane/CH<sub>3</sub>Cl/MeOH gradient and a 60 mL/min flow rate, yielding 8 fractions (SM-9 through SM-16). The fourth fraction, SM-12 (391.90 mg), was subjected to a second round of flash chromatography (12-g silica column, 30 mL/min) separated using a 45 gradient of hexane/EtOAc/MeOH. Of the seven resulting fractions (SM-12-1 through SM-12-7), the fourth fraction, SM-12-4 (108.01 mg), was fractionated using reversed-phase HPLC. The sample was injected onto a Gemini preparatory column (5 µm C18, 250 x 21.20 mm; Phenomenex) at a flow rate of 21.4 mL/min with a 45-min gradient. The gradient began at 40:60 CH<sub>3</sub>CN:H<sub>2</sub>O and increased to 50:50 over 35 min, after which the column was increased to 100:0 and held for 10 min, yielding 7 fractions (SM-12-4-1 through SM-12-4-7). Fraction SM-12-4-5 (3.19 mg) was purified with a final round of reversed-phase chromatography using a Gemini semi-preparatory column (5 µm C18, 250 x 10.00 mm; Phenomenex) at a flow rate of 4.7 mL/min and a 45-min gradient ranging from 43-48% CH<sub>3</sub>CN. Compound **4** eluted at 18 min (0.5 mg, 93% purity, 0.0001% yield).

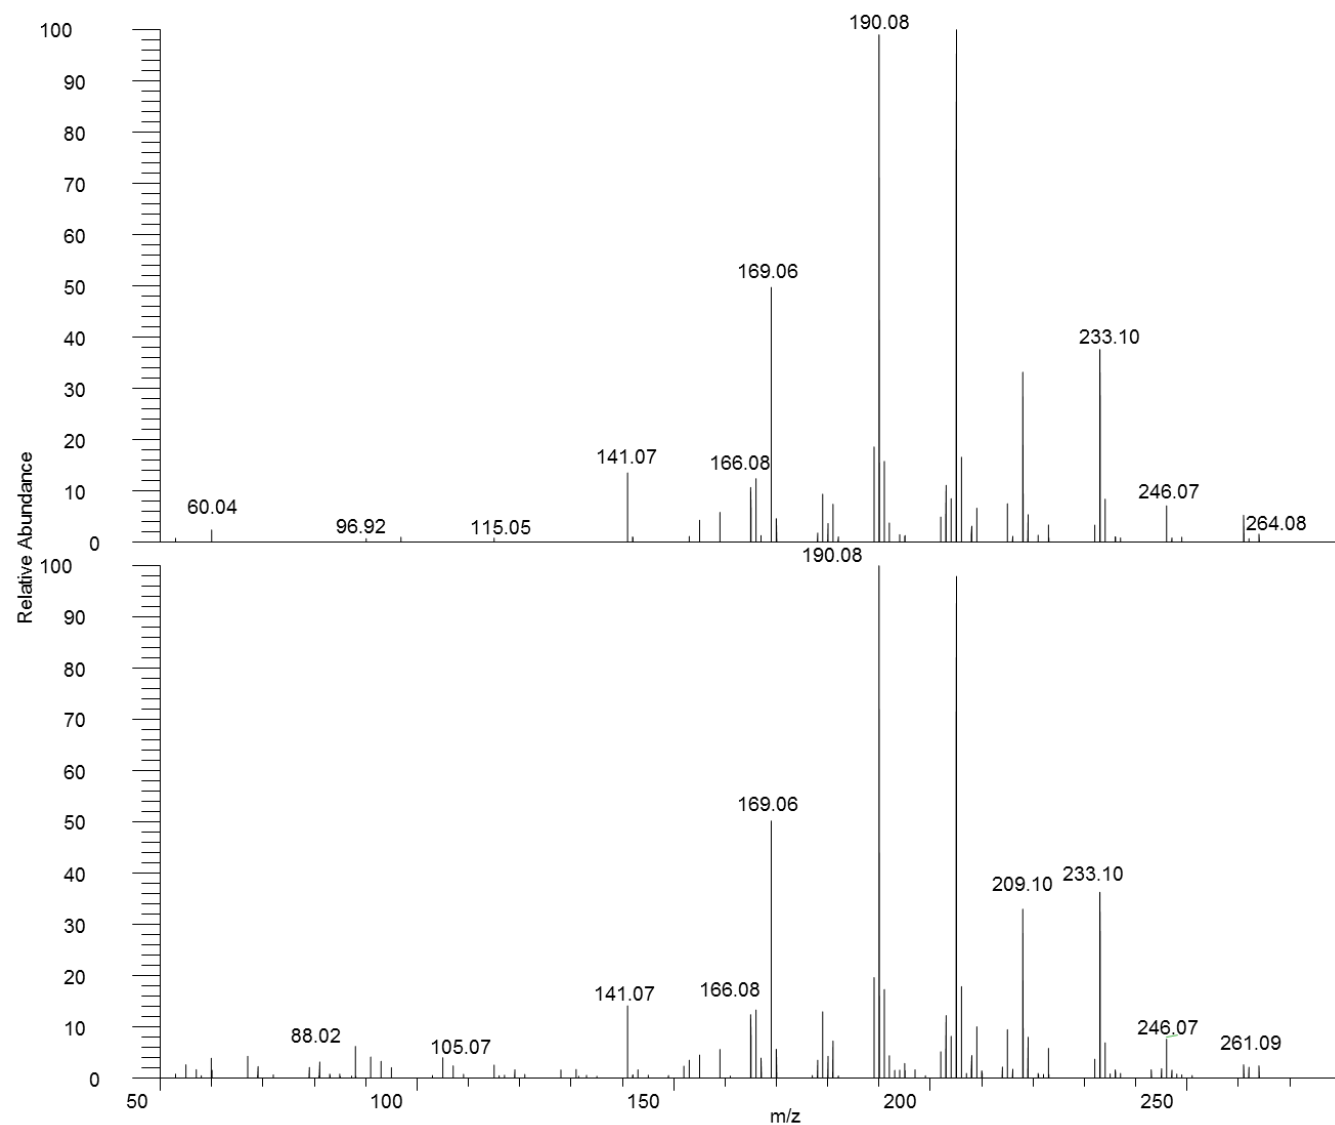

**Figure S2.** Fragmentation patterns of dihydrotanshinone I (compound **2**) fragmented with an HCD of 65. Fragmentation patterns of the pure standard compound (top) match fragmentation patterns of the compound found within the *S. miltiorrhiza* mixture (bottom).

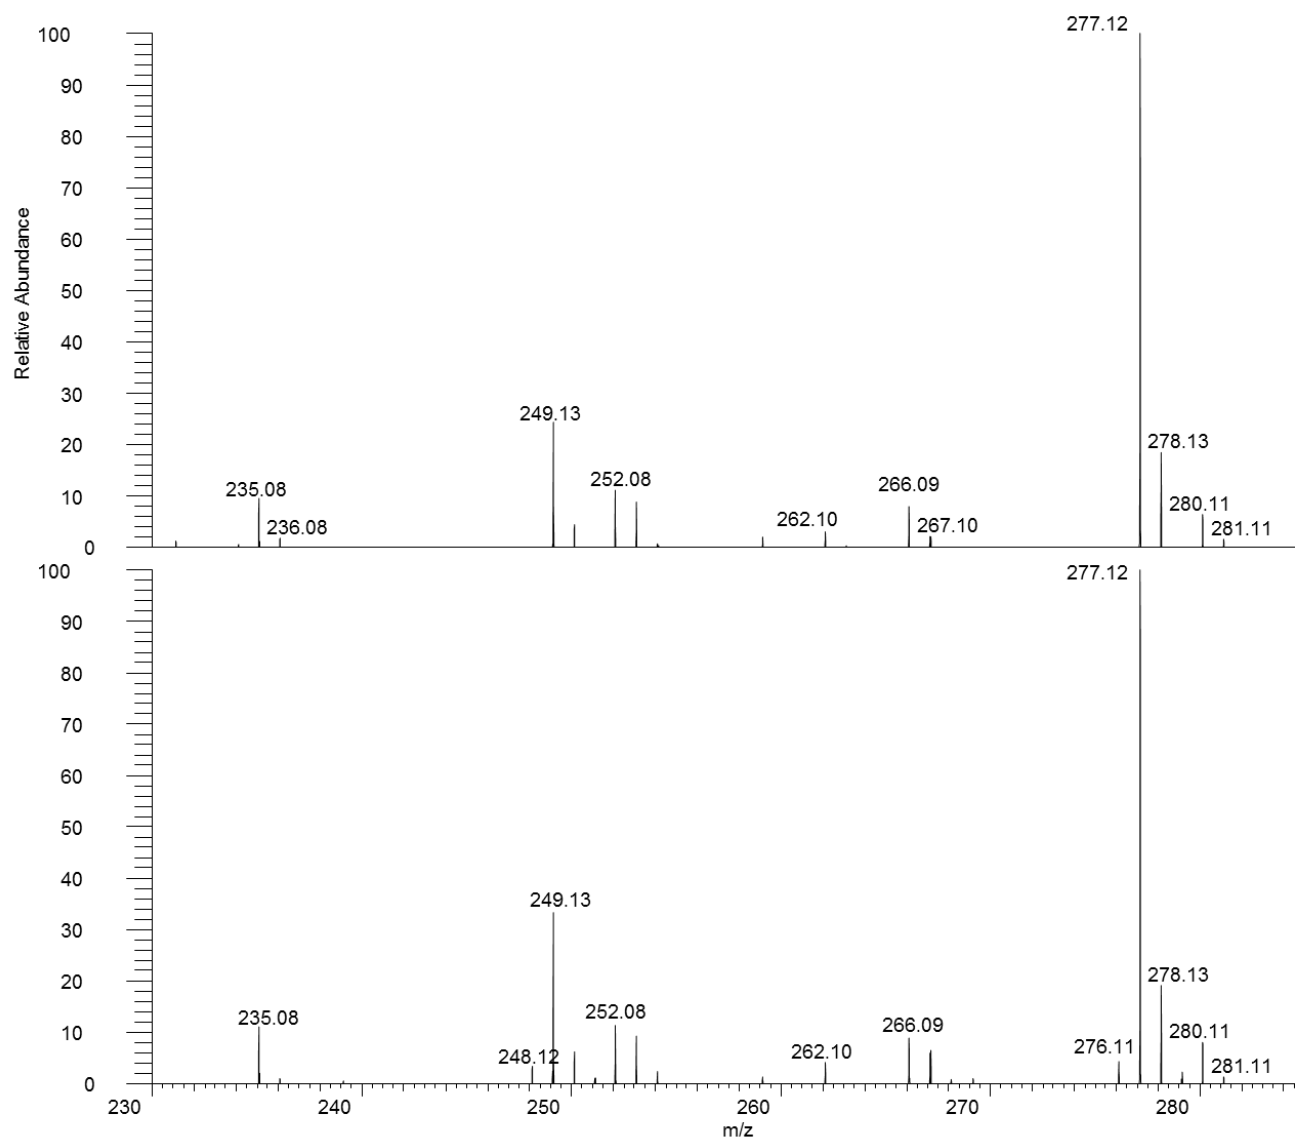

**Figure S3.** Fragmentation patterns of tanshinone IIA (compound **3**) fragmented with an HCD of 30. Fragmentation patterns of the pure standard compound (top) match fragmentation patterns of the compound found within the *S. miltiorrhiza* mixture (bottom).

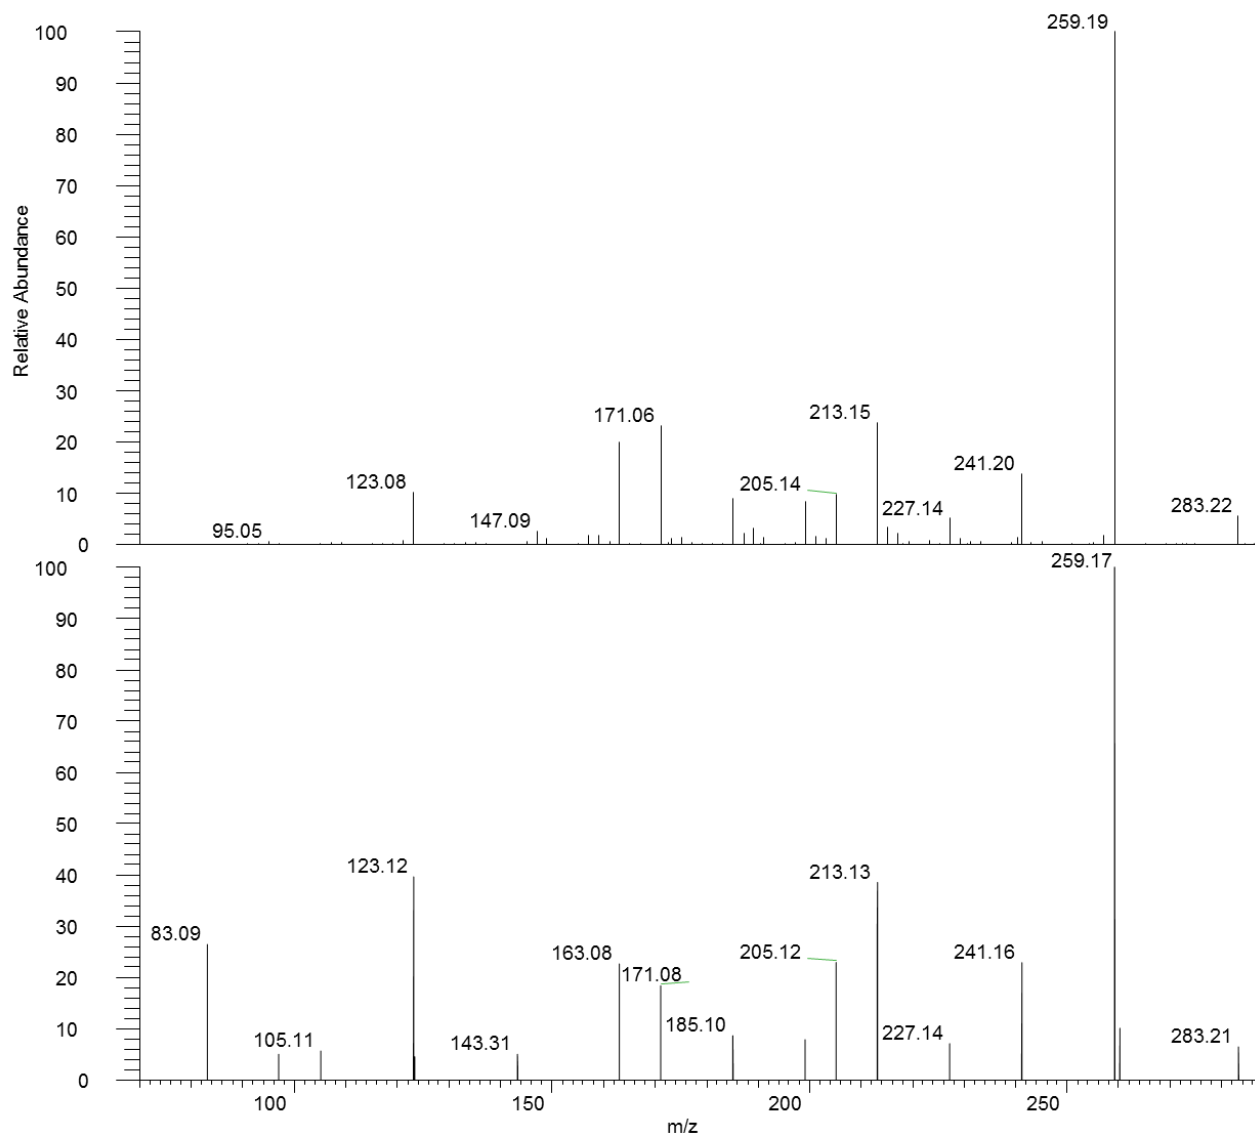

**Figure S4.** Fragmentation patterns of sugiol (compound **5**) fragmented with an HCD of 30. Fragmentation patterns of the purified compound (top) match fragmentation patterns of the compound found within the *S. miltiorrhiza* mixture (bottom).

**Table S1:** NMR data for sugiol (compound **5**) in CDCl<sub>3</sub>, <sup>1</sup>H, HMBC, and HSQC data collected at 500 MHz, and <sup>13</sup>C data collected at 125 MHz. Overlapping assignments (marked with an \*) were determined using HSQC data in Figure S7. Key HMBC correlations have been illustrated on the chemical structure.

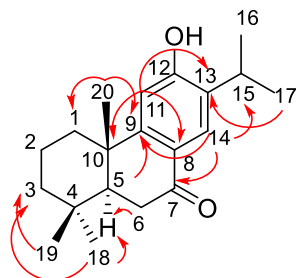

| Position                | <sup>13</sup> C | <sup>1</sup> H                                  | HMBC          |
|-------------------------|-----------------|-------------------------------------------------|---------------|
| 1 $\alpha$<br>1 $\beta$ | 37.97*          | 1.53 m*<br>2.23 dt (J=11.9, 2.8)                |               |
| 2 $\alpha$<br>2 $\beta$ | 18.97           | 1.67 m<br>1.76 tt (J=13.6, 3.3)                 |               |
| 3 $\alpha$<br>3 $\beta$ | 41.42           | 1.25 m*<br>1.53 m*                              |               |
| 4                       | 33.37           |                                                 |               |
| 5                       | 49.53           | 1.85 dd (J=13.7, 4.0)                           | 9             |
| 6 $\alpha$<br>6 $\beta$ | 36.13           | 2.68 dd (J=18.1, 4.0)<br>2.58 dd (J=18.1, 13.8) | 5             |
| 7                       | 198.68          |                                                 |               |
| 8                       | 124.78          |                                                 |               |
| 9                       | 156.52          |                                                 |               |
| 10                      | 37.95*          |                                                 |               |
| 11                      | 110.03          | 6.68 s                                          | 10, 8, 13, 12 |
| 12                      | 158.15          |                                                 |               |
| 13                      | 132.63          |                                                 |               |
| 14                      | 126.63          | 7.90 s                                          | 15, 9, 12, 7  |
| 15                      | 26.88           | 3.12 hept (J=6.9)                               |               |
| 16                      | 22.55           | 1.24 d (J=6.9)                                  | 13, 15, 17    |
| 17                      | 22.42           | 1.26 d (J=6.9)                                  | 13, 16, 15    |
| 18                      | 32.65           | 0.92 s                                          | 19, 3, 5      |
| 19                      | 21.45           | 0.98 s                                          | 18, 3, 5      |
| 20                      | 23.33           | 1.21 s                                          | 1, 5, 9       |

<sup>1</sup>H NMR, 500 MHz, CDCl<sub>3</sub>

|            | 1H    | type, J              |
|------------|-------|----------------------|
| 18         | 0.92  | 3H, s                |
| 19         | 0.98  | 3H, s                |
| 20         | 1.21  | 3H, s                |
| 16         | 1.24  | 3H, d, J=6.9         |
| 3 $\alpha$ | 1.25* | 1H, m                |
| 17         | 1.26  | 3H, d, J=6.9         |
| 1 $\alpha$ | 1.53* | 1H, m                |
| 3 $\beta$  | 1.53* | 1H, m                |
| 2 $\alpha$ | 1.67  | 1H, m                |
| 2 $\beta$  | 1.76  | 1H, tt, J=13.6, 3.3  |
| 5          | 1.85  | 1H, dd, J=13.7, 4.0  |
| 1 $\beta$  | 2.23  | 1H, dt, J=11.9, 2.8  |
| 6 $\beta$  | 2.58  | 1H, dd, J=18.1, 13.8 |
| 6 $\alpha$ | 2.68  | 1H, dd, J=18.1, 4.0  |
| 15         | 3.12  | 1H, hept, J=6.9      |
| 11         | 6.68  | 1H, s                |
| 14         | 7.90  | 1H, s                |

\*overlapping assignments based on HSQC experiments.

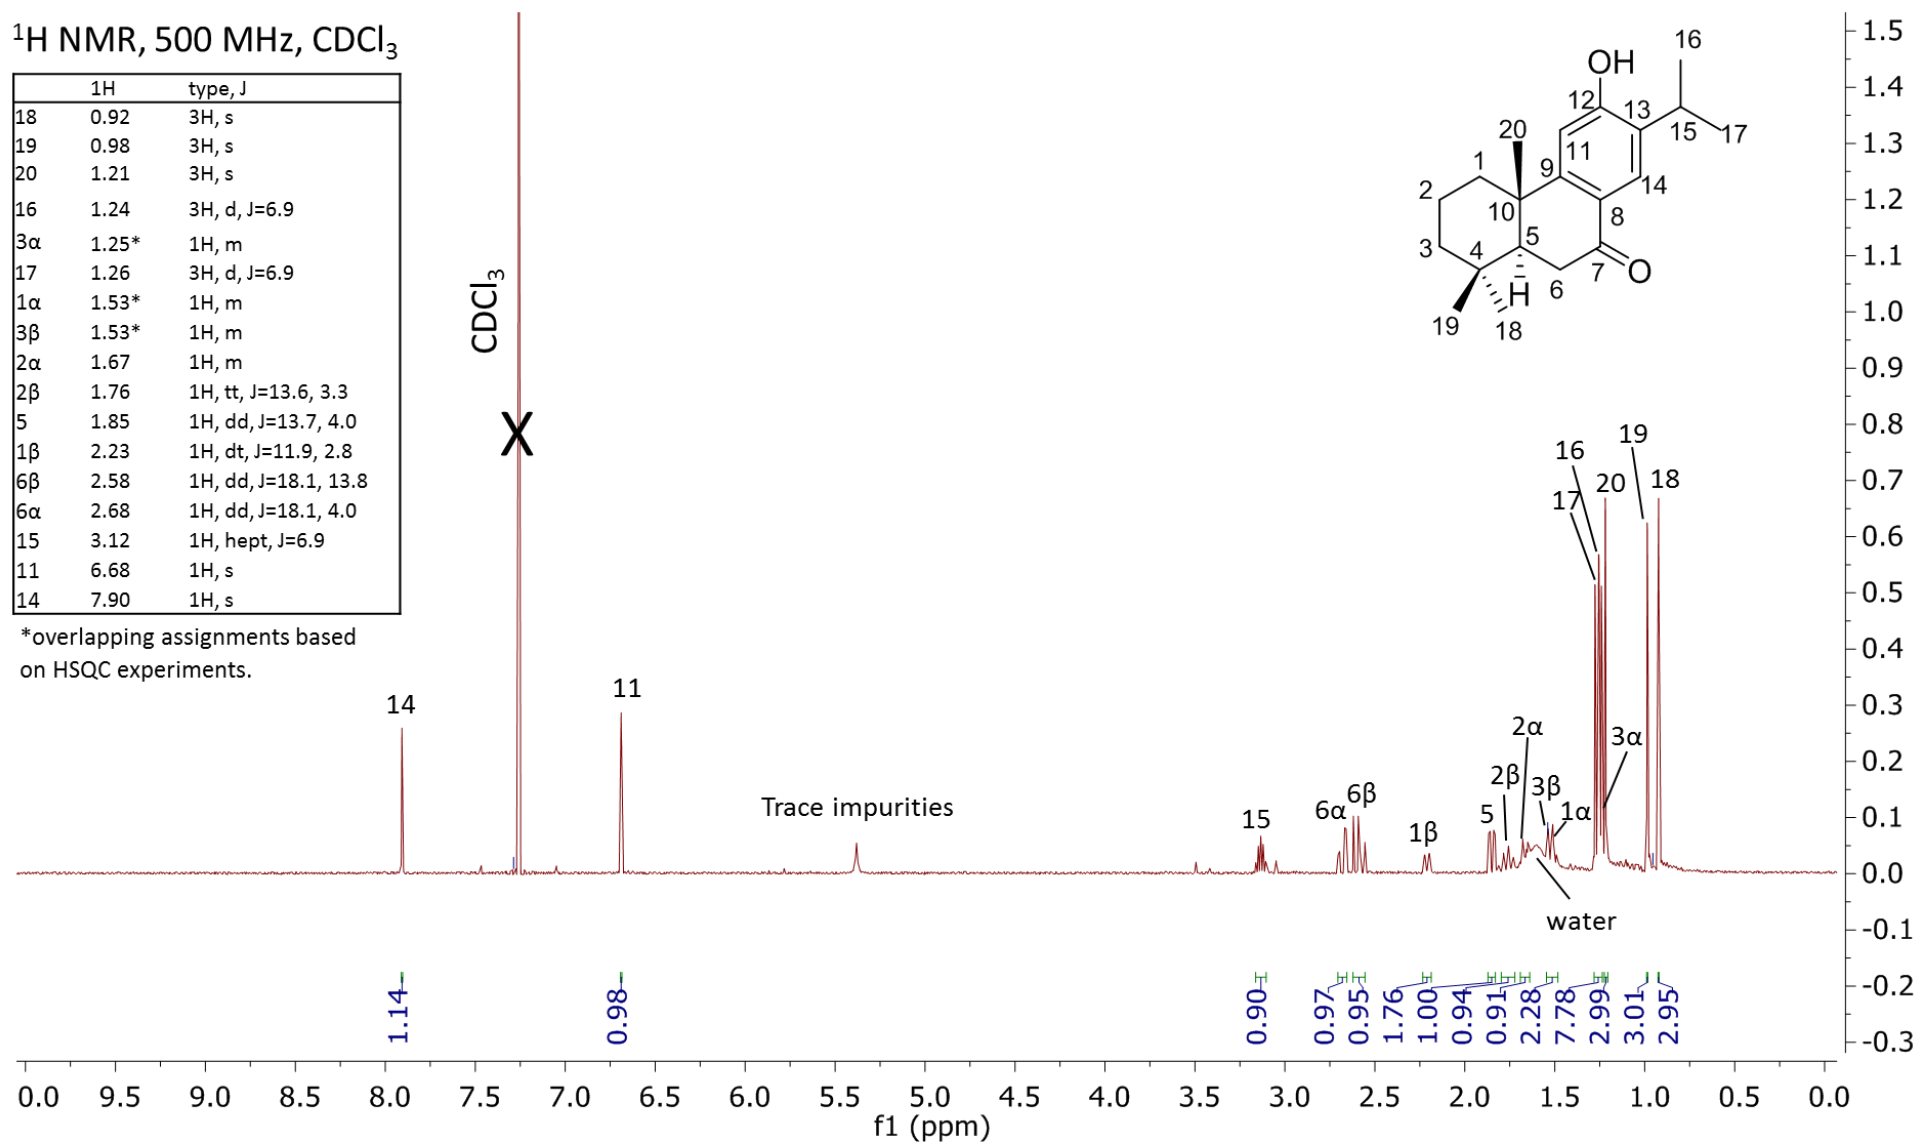

**Figure S5.** <sup>1</sup>H NMR data for compound **5** (500 MHz, CDCl<sub>3</sub>).



$^{13}\text{C}$  NMR, 125 MHz,  $\text{CDCl}_3$

|    | $^{13}\text{C}$ | Type          |
|----|-----------------|---------------|
| 2  | 18.97           | $\text{CH}_2$ |
| 19 | 21.45           | $\text{CH}_3$ |
| 17 | 22.42           | $\text{CH}_3$ |
| 16 | 22.55           | $\text{CH}_3$ |
| 20 | 23.33           | $\text{CH}_3$ |
| 15 | 26.88           | CH            |
| 18 | 32.65           | $\text{CH}_3$ |
| 4  | 33.37           | C             |
| 6  | 36.13           | $\text{CH}_2$ |
| 10 | 37.95*          | C             |
| 1  | 37.97*          | $\text{CH}_2$ |
| 3  | 41.42           | $\text{CH}_2$ |
| 5  | 49.53           | CH            |
| 11 | 110.03          | CH            |
| 8  | 124.78          | C             |
| 14 | 126.63          | CH            |
| 13 | 132.63          | C             |
| 9  | 156.52          | C             |
| 12 | 158.15          | C-OH          |
| 7  | 198.68          | ketone        |

\*overlapping assignments based on HSQC experiments.

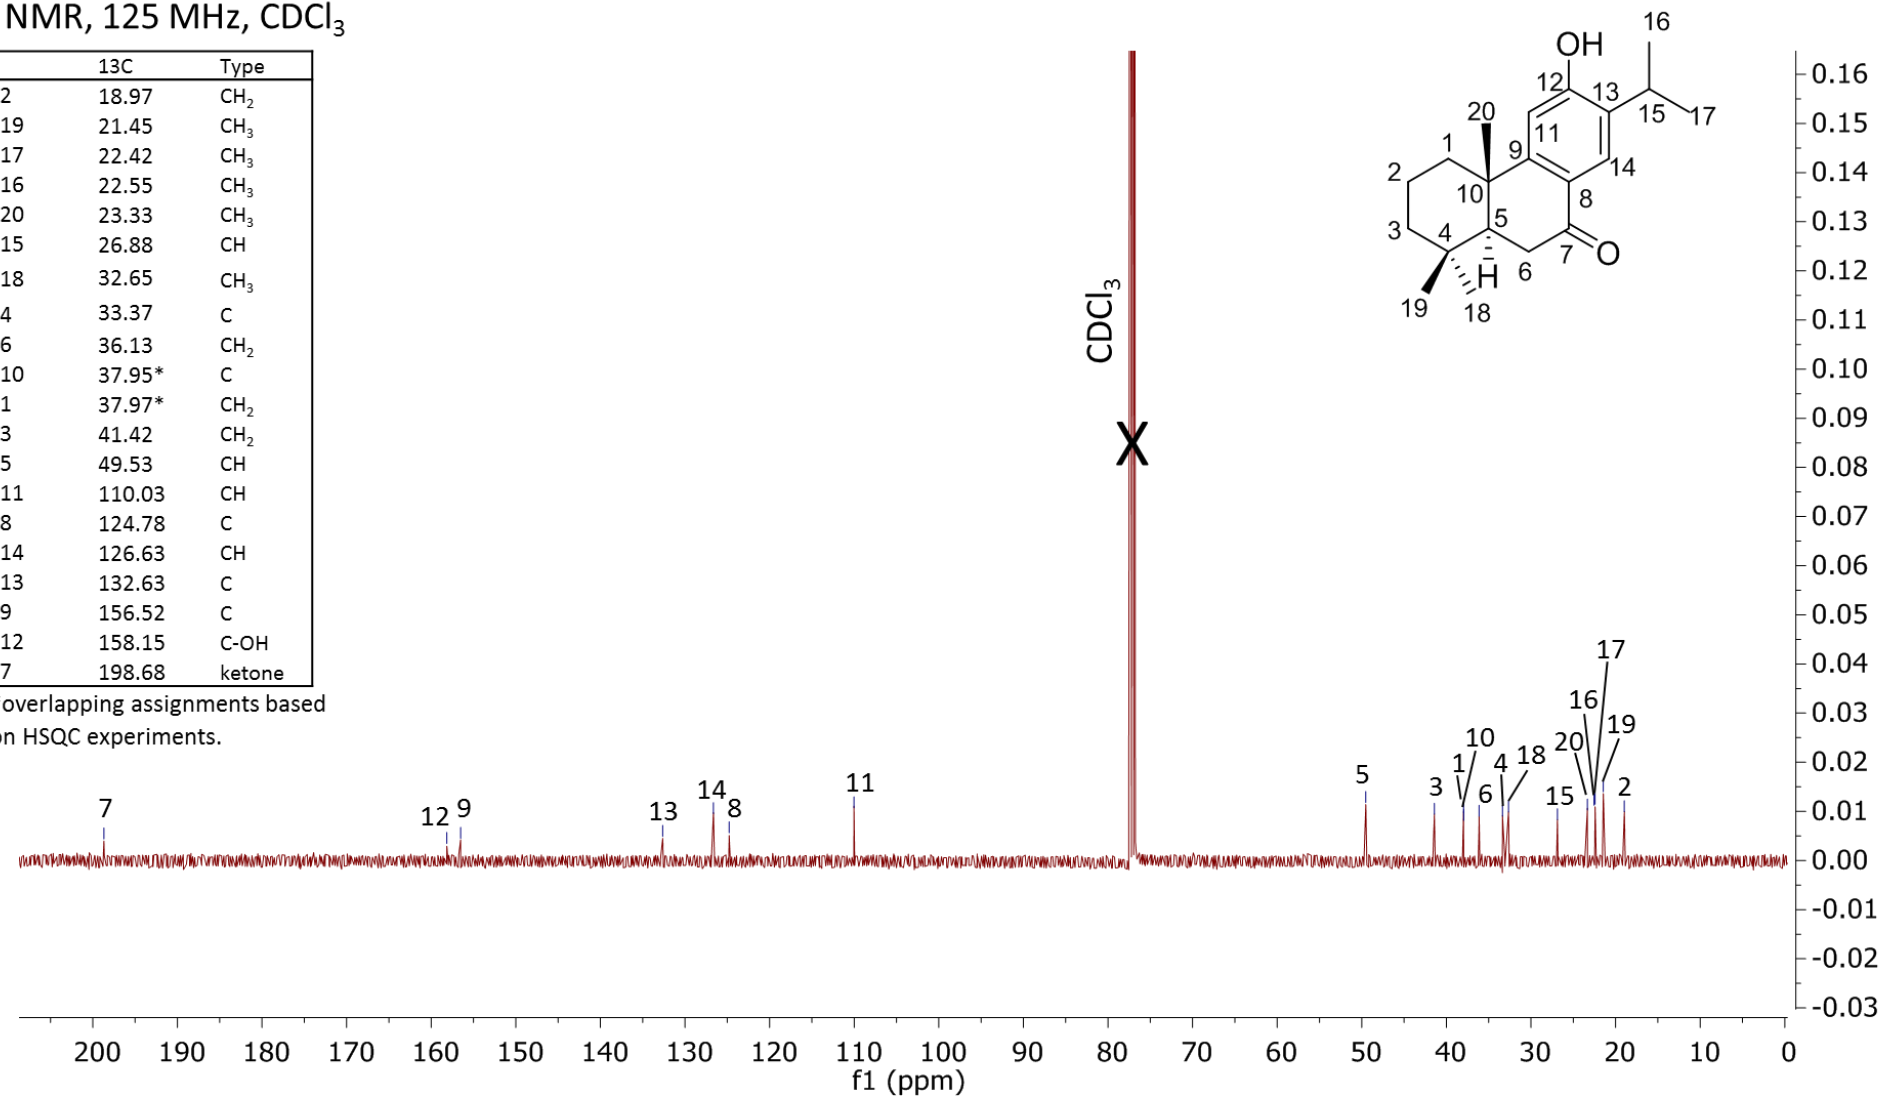

**Figure S6.**  $^{13}\text{C}$  NMR data for compound **5** (125 MHz,  $\text{CDCl}_3$ ).

HSQC, 500 MHz,  $\text{CDCl}_3$

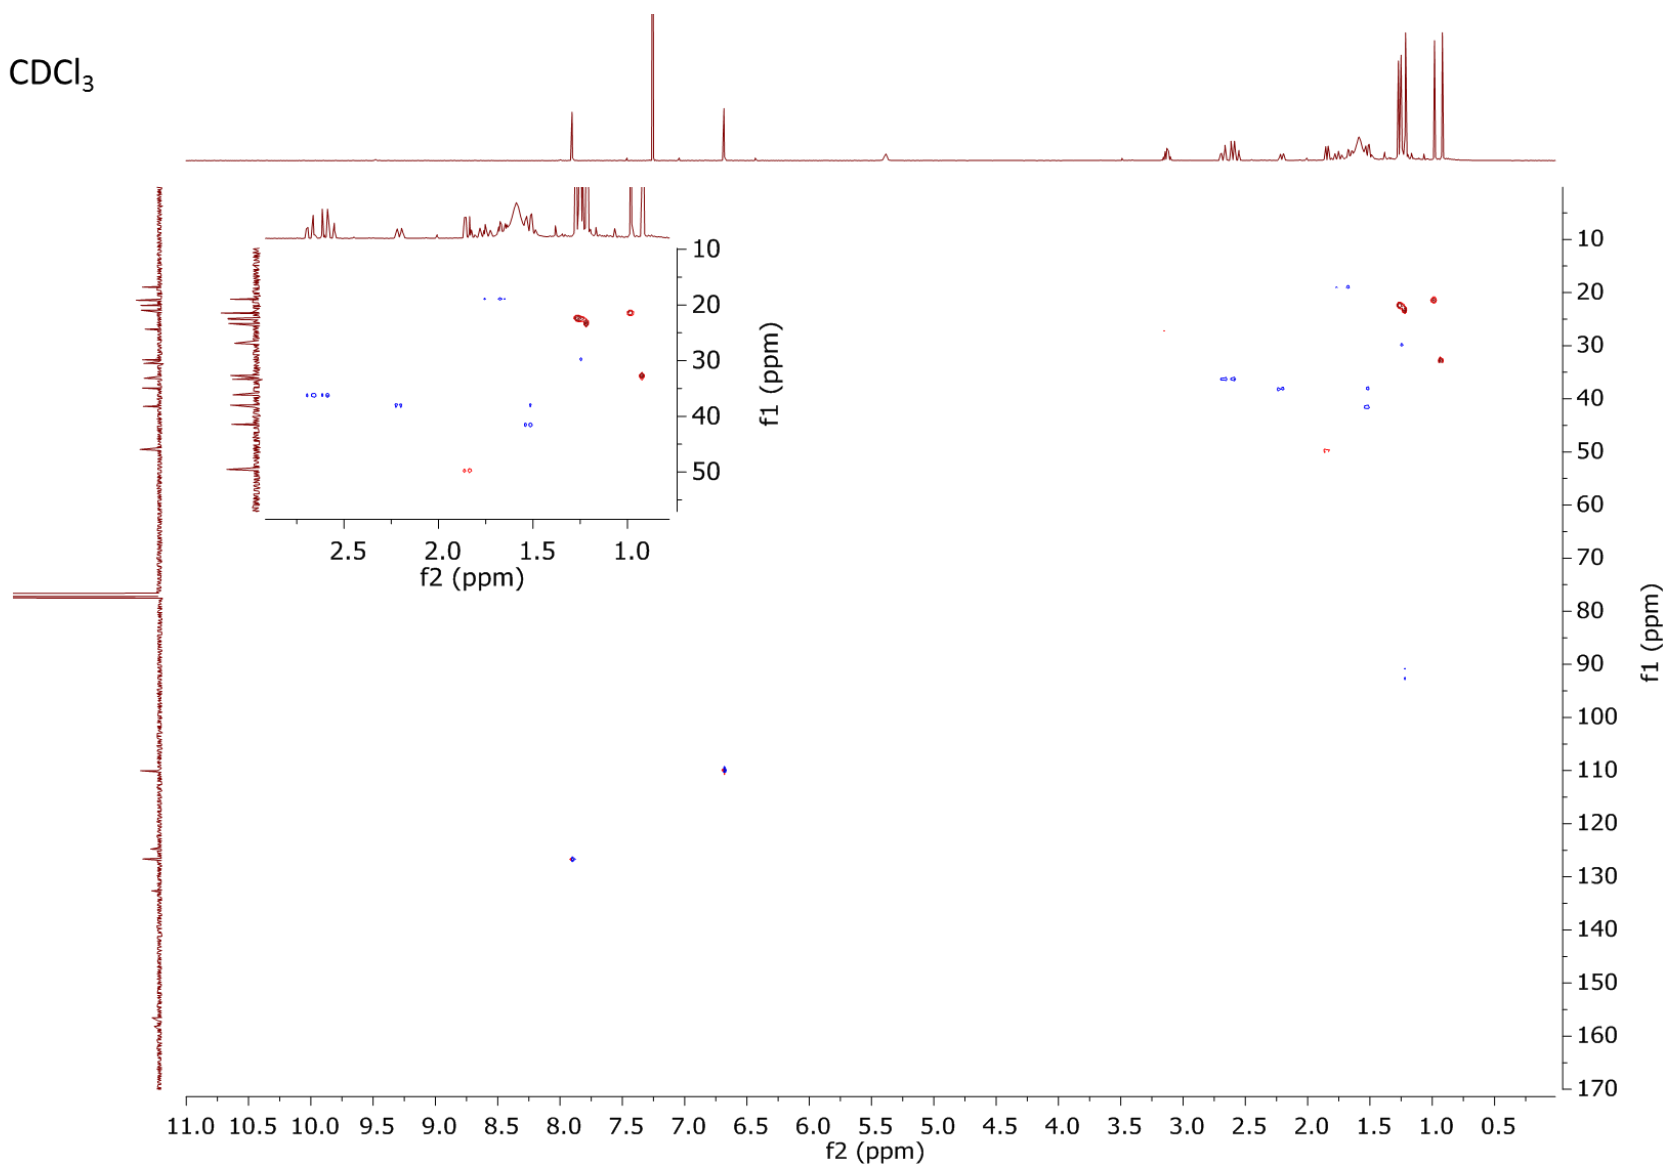

**Figure S7.** HSQC data for compound **5** (500 MHz,  $\text{CDCl}_3$ ).

HMBC, 500 MHz, CDCl<sub>3</sub>

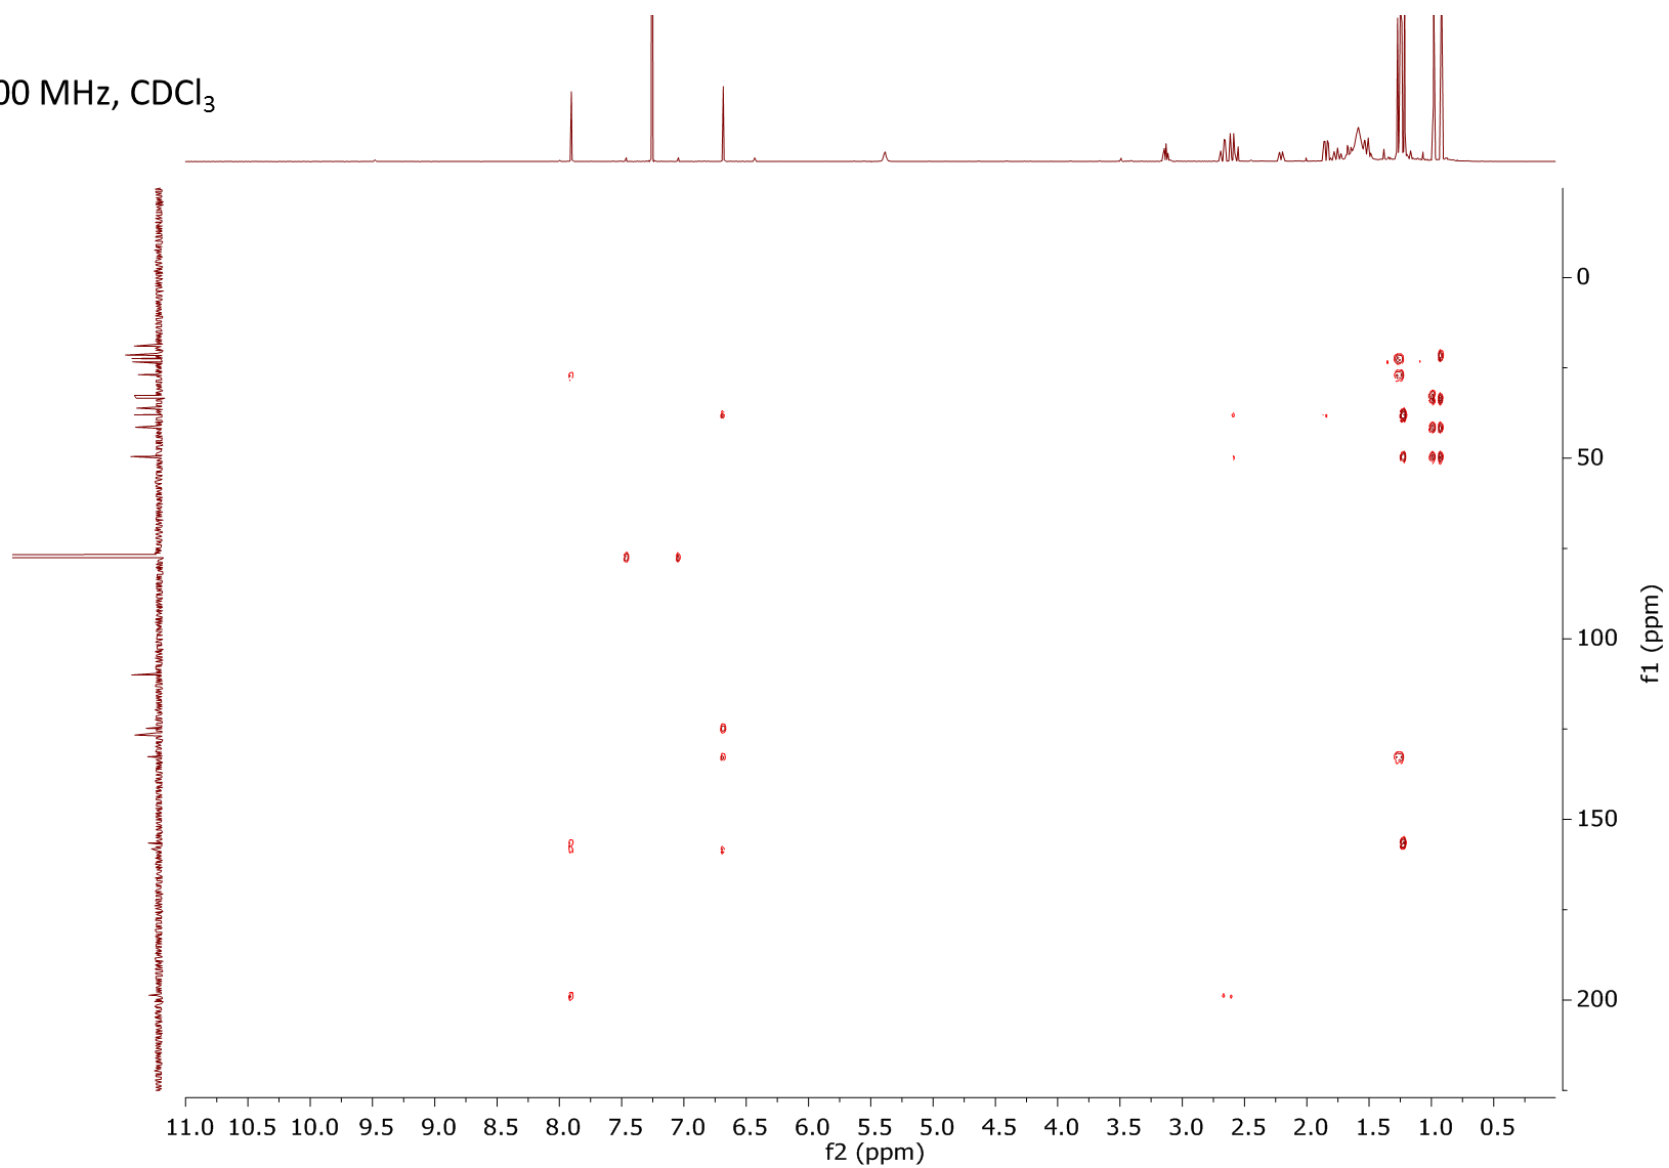

**Figure S8.** HMBC data for compound **5** (500 MHz, CDCl<sub>3</sub>).

<sup>1</sup>H NMR, 500 MHz, DMSO-d<sub>6</sub>

|    | 1H         | type, J              |
|----|------------|----------------------|
| 18 | 0.88       | 3H, s                |
| 19 | 0.94       | 3H, s                |
| 16 | 1.12       | 3H, d, J=6.9         |
| 20 | 1.14       | 3H, s                |
| 17 | 1.15       | 3H, d, J=6.9         |
| 3α | 1.19-1.61* | 1H, m                |
| 1α | 1.19-1.61* | 1H, m                |
| 3β | 1.19-1.61* | 1H, m                |
| 2α | 1.19-1.61* | 1H, m                |
| 2β | 1.19-1.61* | 1H, m                |
| 5  | 1.73       | 1H, dd, J=13.7, 3.9  |
| 1β | 2.13       | 1H, br d, J=12.3     |
| 6β | 2.45       | 1H, dd, J=17.7, 3.8  |
| 6α | 2.55       | 1H, dd, J=17.7, 13.6 |
| 15 | 3.13       | 1H hept, J=6.9       |
| 11 | 6.75       | 1H, s                |
| 14 | 7.63       | 1H, s                |

\*overlapping peaks were not assigned specifically, but were assigned within a range, consistent with previous reports [1]

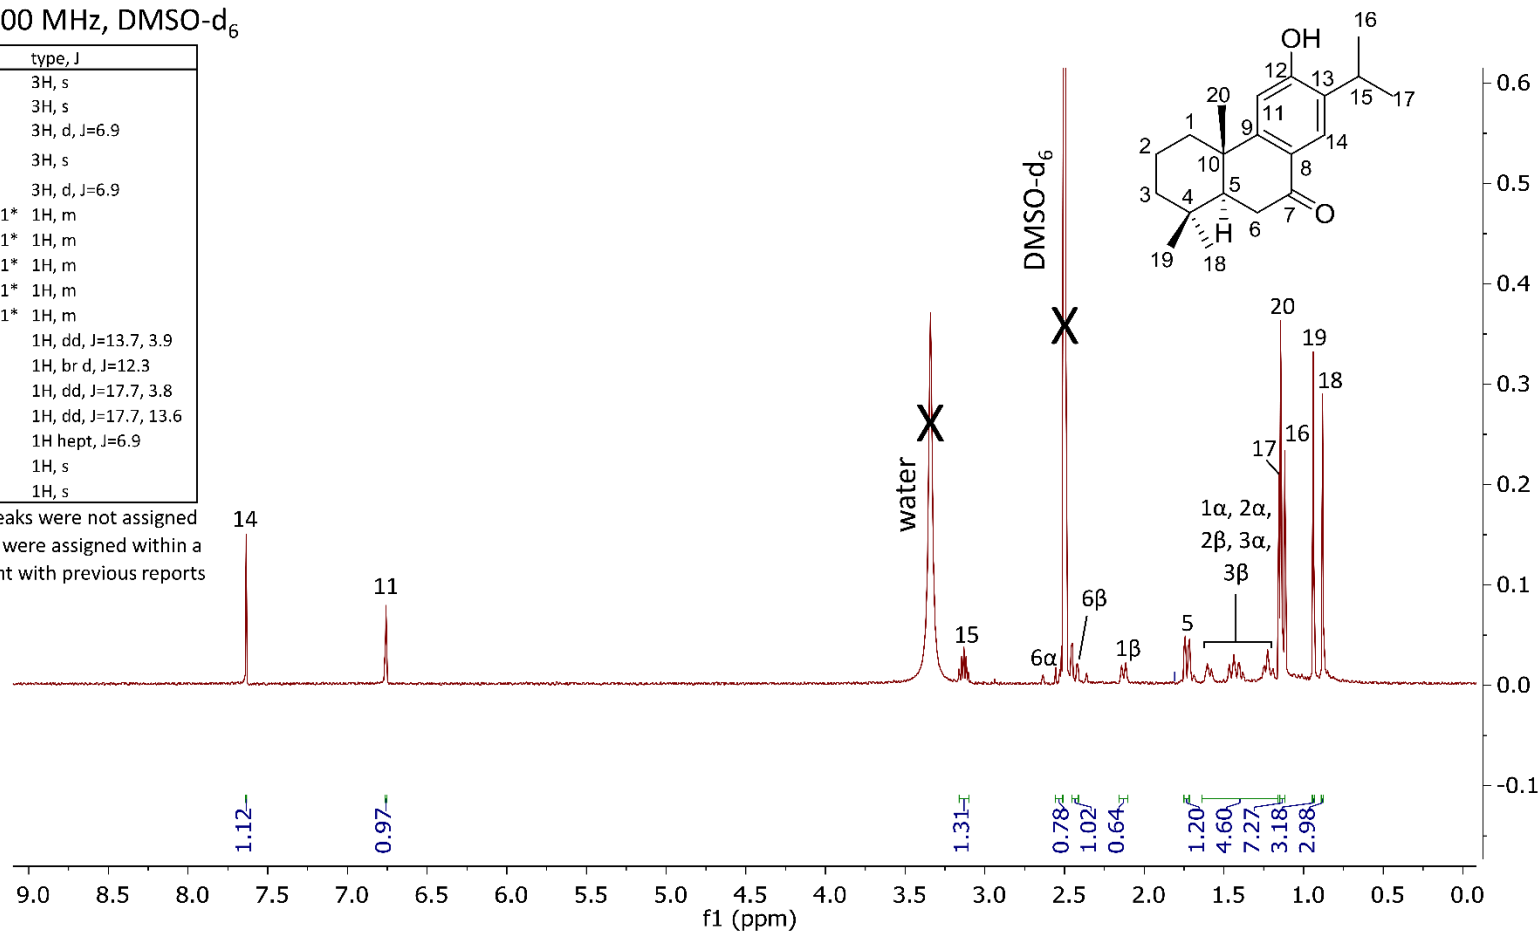

**Figure S9.** <sup>1</sup>H NMR data for compound **5** (500 MHz, DMSO-d<sub>6</sub>). Data are consistent with previous reports.<sup>1</sup>

$^1\text{H}$  NMR, 500 MHz,  $\text{CDCl}_3$

|                               | $^1\text{H}$ | type, J            |
|-------------------------------|--------------|--------------------|
| 18-19                         | 1.29*        | 3H, s              |
|                               | 1.30*        | 3H, s              |
| 17                            | 1.34         | 3H, d, J=6.8       |
| 2,3                           | 1.64*        | 2H, m              |
|                               | 1.77*        | 2H, m              |
| 1                             | 3.2          | 2H, t, J=6.4       |
| 15 $\alpha$ , 15 $\beta$ , 16 | 3.59*        | 1H, dt, J=9.6, 6.4 |
|                               | 4.35*        | 1H, dd, J=9.3, 6.0 |
|                               | 4.88*        | 1H, t, J=9.5       |
| 6,7                           | 7.48*        | 1H, d, J=8.1       |
|                               | 7.62*        | 1H, d, J=8.1       |

\* Peaks were not assigned specifically between protons. All chemical shifts matched those reported in a previous study [2]

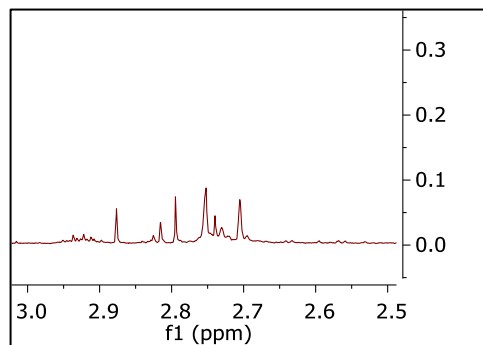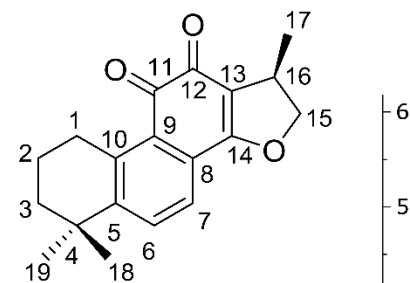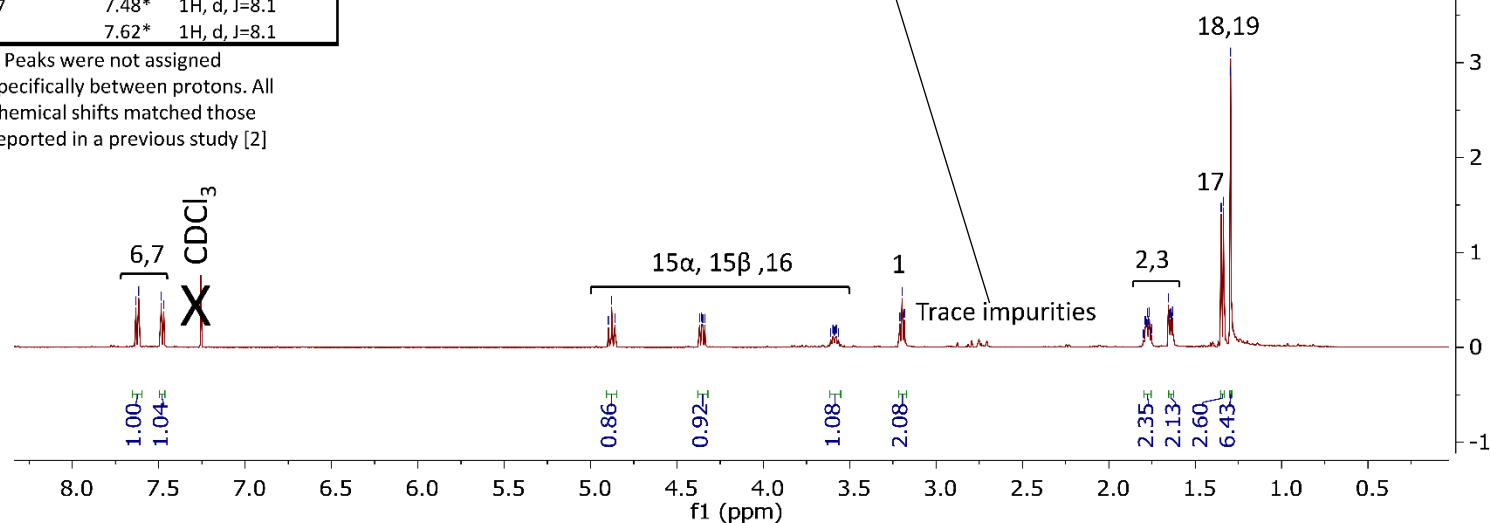

**Figure S10.**  $^1\text{H}$  NMR data for compound **1** (500 MHz,  $\text{CDCl}_3$ ). Data are consistent with previous reports.<sup>2</sup>

$^{13}\text{C}$  NMR, 125 MHz,  $\text{CDCl}_3$

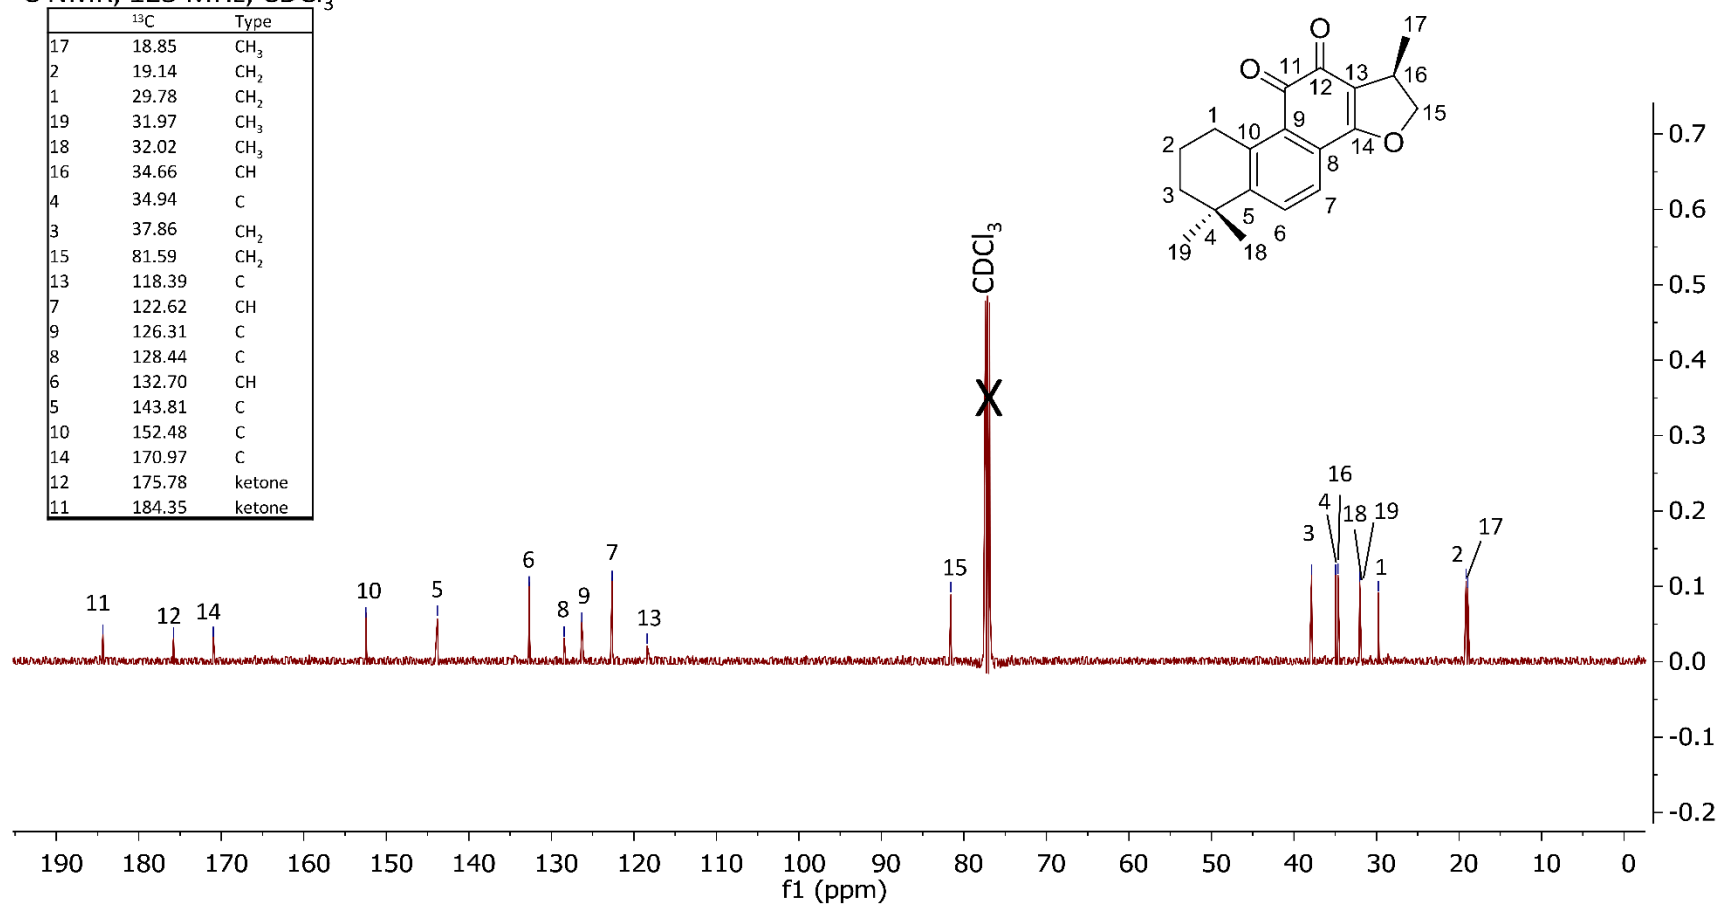

**Figure S11.**  $^{13}\text{C}$  NMR data for compound **1** (125 MHz,  $\text{CDCl}_3$ ). Traces are consistent with previous reports.<sup>2</sup>

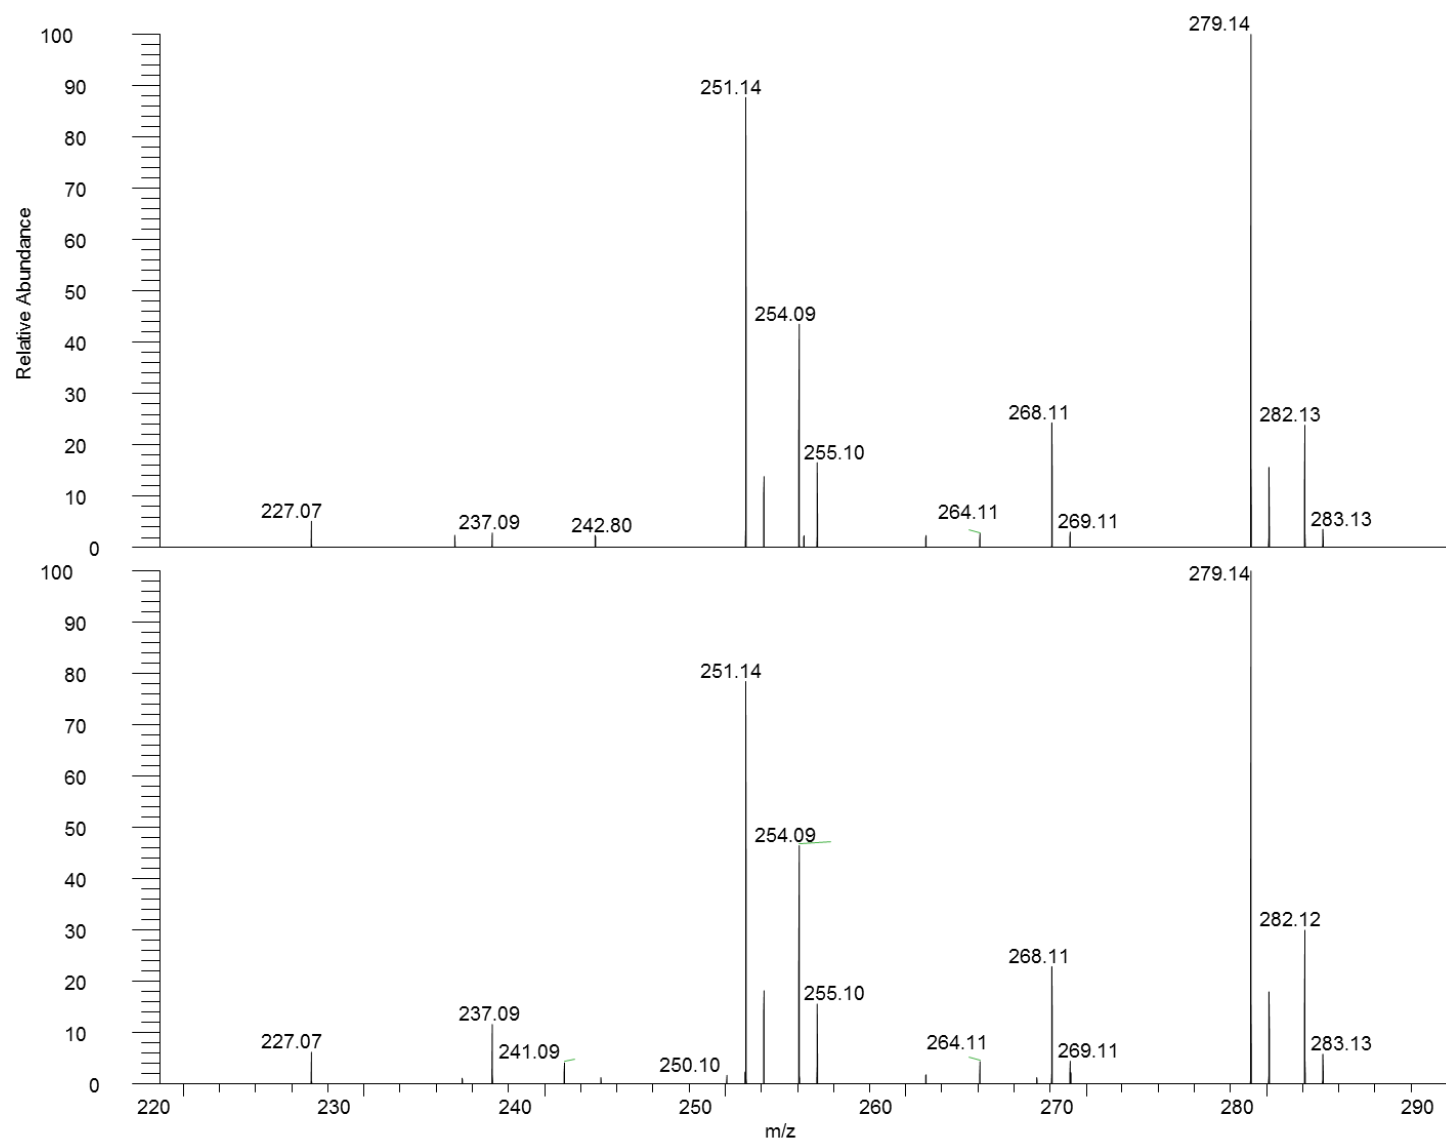

**Figure S12.** Fragmentation patterns of cryptotanshinone (compound **1**) fragmented with an HCD of 30. Fragmentation patterns of the pure standard compound (A) match fragmentation patterns of the compound isolated from the *S. miltiorrhiza* mixture (B).

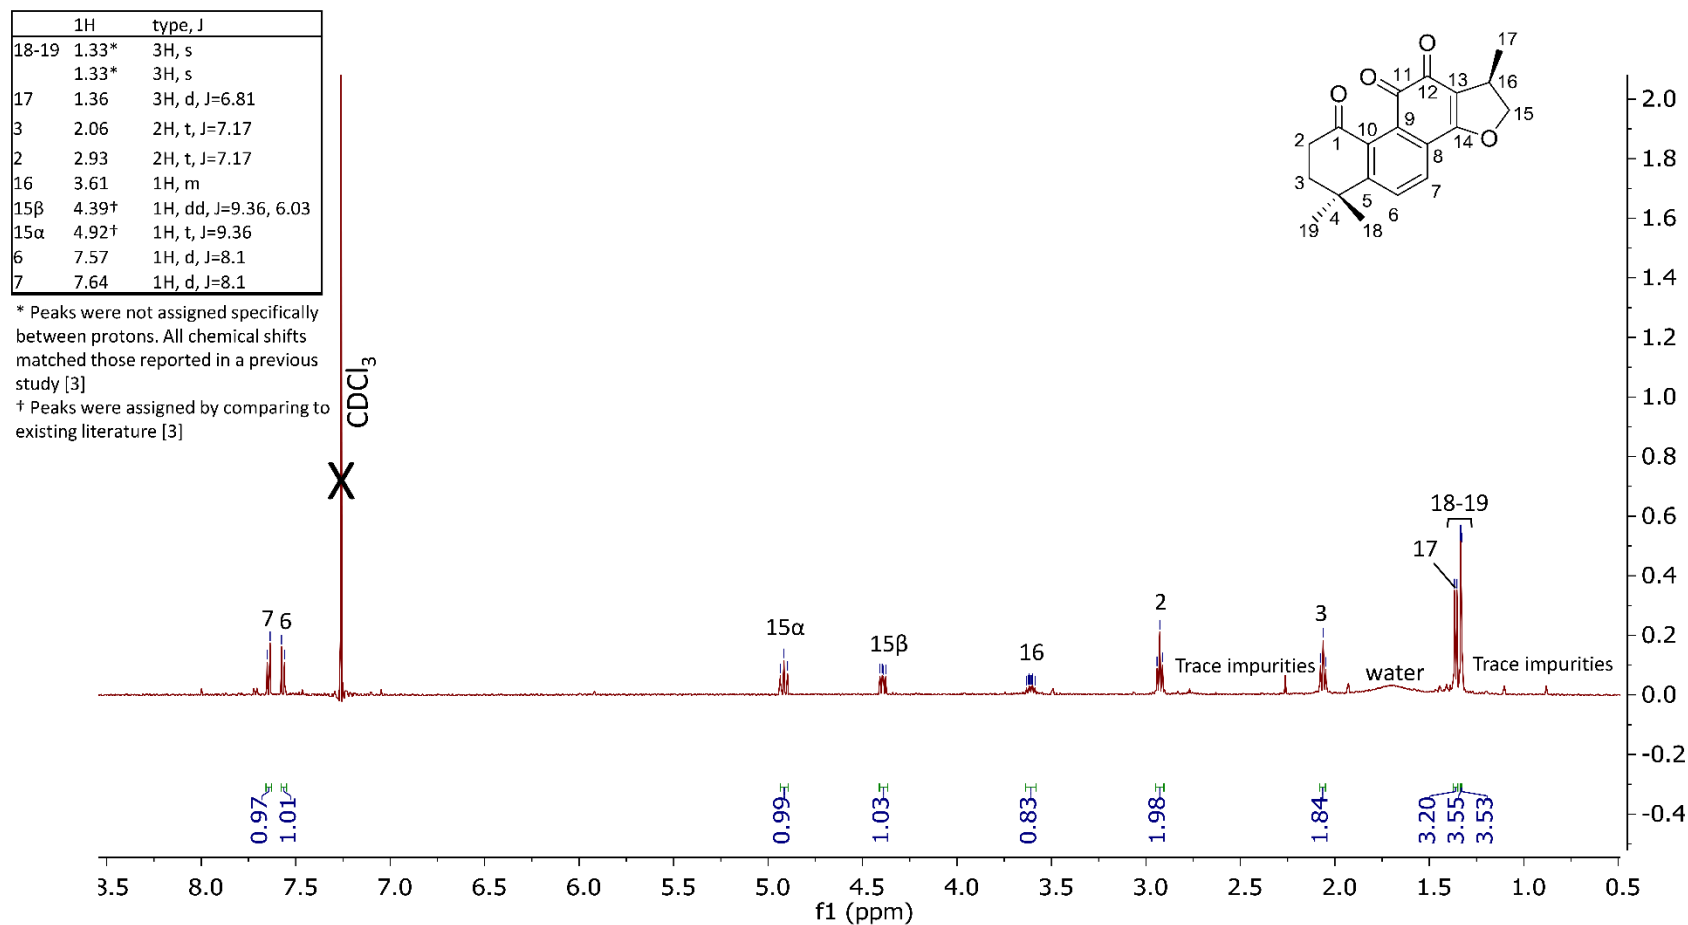

**Figure S13:** <sup>1</sup>H-NMR data for compound **4** (500 MHz, CDCl<sub>3</sub>). Data are consistent with previous reports.<sup>3</sup>



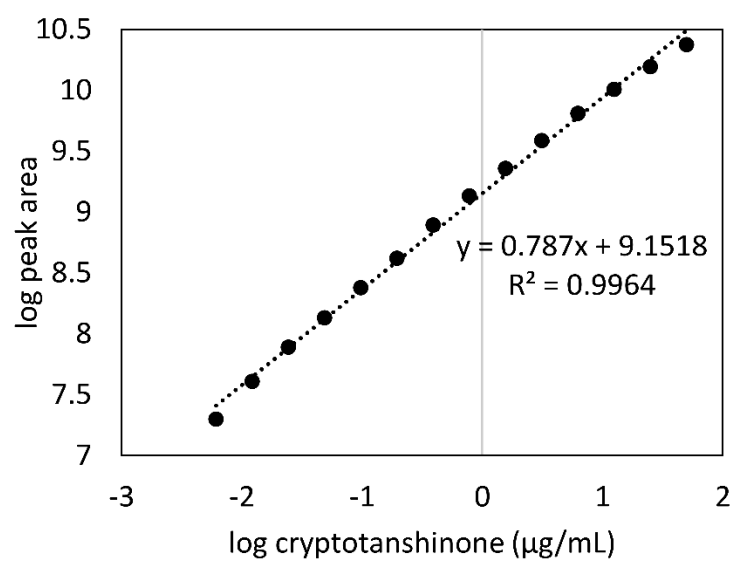

**Figure S14.** Calibration curve of cryptotanshinone used to quantify cryptotanshinone in each *S. miltiorrhiza* fraction.

**Table S2:** Complete list of chemical contaminants removed from analysis using hierarchical cluster analysis coupled to spectral variable inspection of triplicate injections. Chemical contaminants were consistent across samples.

| Accurate Mass | Ionization Mode | Retention Time (min) | Tentative Identification*                                      | Ion Type                                                        |
|---------------|-----------------|----------------------|----------------------------------------------------------------|-----------------------------------------------------------------|
| 279.159       | Positive        | 8.66                 | Dibutylphthalate                                               | [M+H] <sup>+</sup>                                              |
| 336.636       | Positive        | 5.88                 |                                                                |                                                                 |
| 357.133       | Negative        | 3.88                 |                                                                |                                                                 |
| 357.133       | Positive        | 4.04                 |                                                                |                                                                 |
| 357.134       | Negative        | 4.30                 |                                                                |                                                                 |
| 357.134       | Positive        | 4.70                 |                                                                |                                                                 |
| 367.117       | Positive        | 4.38                 |                                                                |                                                                 |
| 536.166       | Positive        | 8.55                 | Polysiloxane, [C <sub>2</sub> H <sub>6</sub> SiO] <sub>7</sub> | [M+NH <sub>4</sub> ] <sup>+</sup>                               |
| 537.166       | Positive        | 8.55                 | Polysiloxane, [C <sub>2</sub> H <sub>6</sub> SiO] <sub>7</sub> | [M+NH <sub>4</sub> ] <sup>+</sup> , <sup>13</sup> C isotope     |
| 537.147†      | Positive        | 8.56                 |                                                                |                                                                 |
| 538.165       | Positive        | 8.56                 | Polysiloxane, [C <sub>2</sub> H <sub>6</sub> SiO] <sub>7</sub> | [M+NH <sub>4</sub> ] <sup>+</sup> , 2 × <sup>13</sup> C isotope |
| 539.149 †     | Positive        | 8.56                 |                                                                |                                                                 |
| 539.165 †     | Positive        | 8.55                 |                                                                |                                                                 |
| 539.208       | Positive        | 7.31                 |                                                                |                                                                 |
| 540.161 †     | Positive        | 8.55                 |                                                                |                                                                 |
| 541.161 †     | Positive        | 8.55                 |                                                                |                                                                 |
| 837.216       | Positive        | 8.97                 |                                                                |                                                                 |
| 837.224       | Positive        | 8.57                 |                                                                |                                                                 |

\* Tentative identifications accomplished using the following reference: Keller, B.O.; Sui, J.; Young, A.B.; Whittall, R.M. *Anal Chim Acta*. **2008**, 627(1), 71-81.<sup>4</sup>

† These masses represent peaks we believe to be associated with polysiloxane isotopes (containing more than 2 × <sup>13</sup>C) and/or mass spectral artefacts. They were too low abundant to be fragmented using the LC-MS data analysis method, so they could not be confirmed to be the same as tentatively identified polysiloxanes. Instead, we have tentatively identified them by their similarity in accurate mass/retention time to putatively identified polysiloxanes from Keller et al.<sup>4</sup>

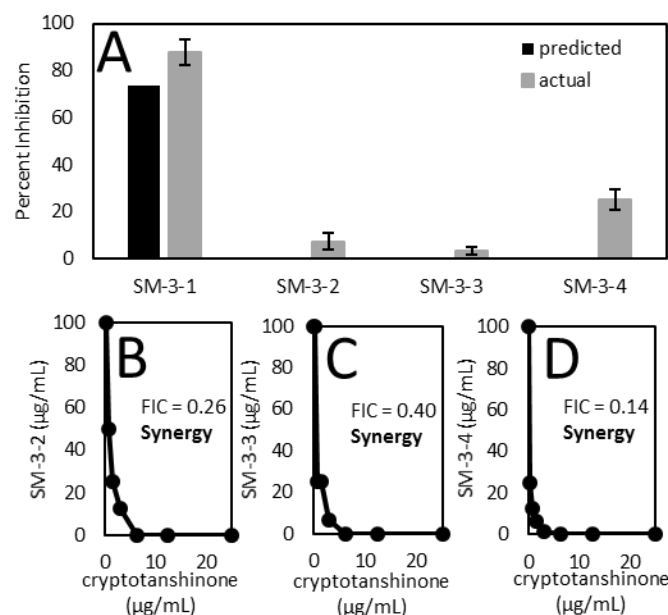

**Figure S15A.** Predicted versus actual activities of sub-fractions simplified from synergistic fraction SM-3 measured at 10  $\mu\text{g/mL}$ . Although predicted and actual did not show a mismatch, we predicted that synergistic compounds were separated from cryptotanshinone which was used to calculate predicted activity. Cryptotanshinone was used as a positive control, and its MIC (25  $\mu\text{g/mL}$ ) is consistent with previous reports.<sup>5</sup> Indeed, when isobolograms were generated for synergy testing, isobolograms of SM-3-2 (**B**), SM-3-3 (**C**), and SM-3-4 (**D**) all possessed synergy with FIC values of 0.26, 0.40, and 0.14 respectively.

FICs were calculated using the following equation:  $[A]/IC_{50A} + [B]/IC_{50B} = \text{FIC}$ , where  $IC_{50A}$  is the  $IC_{50}$  of cryptotanshinone alone,  $IC_{50B}$  is the  $IC_{50}$  of the fraction alone,  $[A]$  is the  $IC_{50}$  of cryptotanshinone in combination with fraction, and  $[B]$  is the  $IC_{50}$  of fraction in combination with cryptotanshinone. Synergy  $\equiv \text{FIC} < 0.5$ , additivity  $\equiv 0.5 < \text{FIC} < 1.0$ , Indifference  $\equiv 1.0 < \text{FIC} < 4.0$  Antagonism  $\equiv \text{FIC} > 4.0$ .

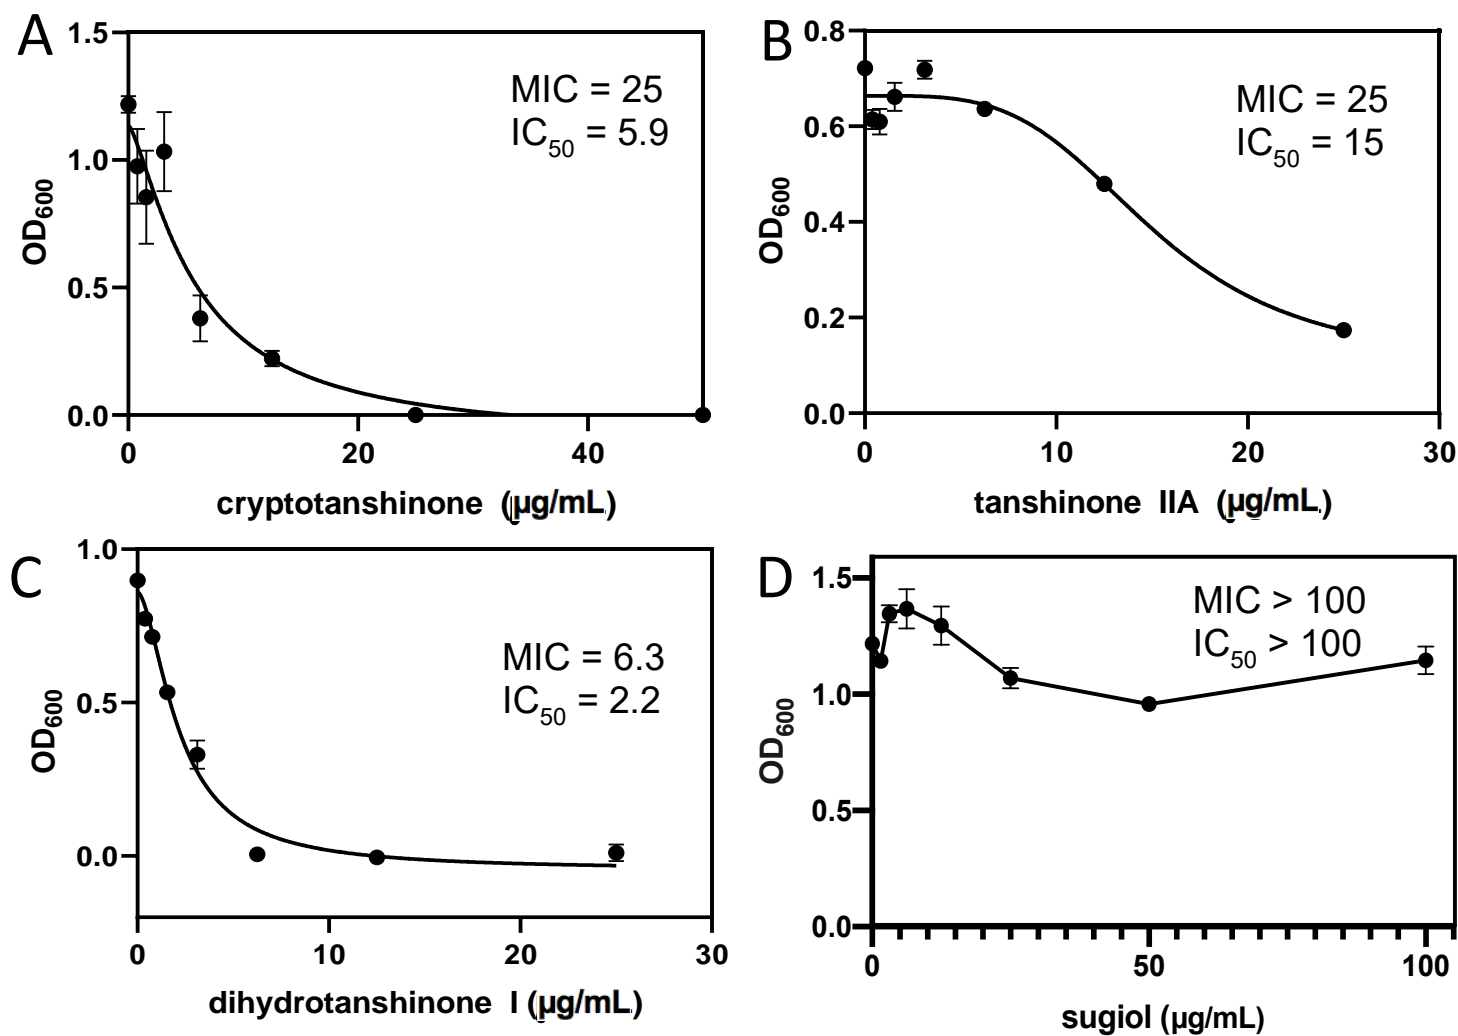

**Figure S16.** Dose response curves for cryptotanshinone (A), tanshinone IIA (B), dihydrotanshinone I (C), and sugiol (D). Curves were fit using a four-parameter logistic model in A-C. Sugiol, plotted in Figure S16D, did not possess antimicrobial activity, so a curve was not fit to this data.

## REFERENCES

- [1] Li, A.; She, S.; Zhang, J.; Wu, T.; Pan, X. *Tetrahedron* **2003**, 59, 5737-5741.
- [2] Kang, H.S.; Chung, H.Y.; Jung, J.H.; Kang, S.S.; Choi, J.S. *Arch. Pharmacol Res.* **1997**, 20, 496.
- [3] Sairafianpour, M.; Christensen, J.; Staerk, D.; Budnik, B.A.; Kharazmi, A.; Bagherzadeh, K.; Jaroszewski, J.W. *J. Nat. Prod.* **2001**, 64, 1398-1403.
- [4] Keller, B.O.; Sui, J.; Young, A.B.; Whittal, R.M. *Anal. Chim. Acta* **2008**, 627, 71-81.
- [5] Lee, D.S.; Lee, S.H.; Noh, J.G.; Hong, S.D. *Biosci., Biotechnol., Biochem.* **1999**, 63, 2236-2239.
